# Supplementary material for: Transcriptomic analysis of long noncoding RNAs and mRNAs expression profiles in the spinal cord of bone cancer pain rats
Source: Mol Brain. 2020 Mar 24;13:47. doi: 10.1186/s13041-020-00589-2 (PMC7092675; doi:10.1186/s13041-020-00589-2)
Supplement: Supplementary file 1 — Additional file 1: Table S1. Average paw withdrawal mechanical threshold (PWMT) of each animal at each timepoint. [file 13041_2020_589_MOESM1_ESM.xlsx]

## Sheet: Sheet1
Table S1. Average paw withdrawal mechanical threshold (PWMT) of each animal at each timepoint.
	sham						BCP
BL	26	20.5	26	15	26	26	26	20	26	15	26	20.5
2	26	26	20.5	26	20.5	26	26	15	26	20.5	15	20.5
4	20.5	20.5	26	26	18	26	15	10	20	15	10	20.5
6	26	15	26	20.5	20.5	26	11.5	6	15	15	8	11.5
8	26	18	26	15	15	20.5	8	4	6	3	4	10
10	15	26	26	15	26	20.5	3	6	4	6	1.7	6
12	15	15	26	26	20.5	26	1.7	4	2	6	3	1.7
14	20.5	15	20.5	26	15	20.5	1.5	2.7	6	6	2	1
Note: sham: sham-operated group, BCP: bone cancer pain group, n = 6, per group; timepoints of test: baseline (BL), 2, 4, 6, 8, 10, 12, 14 days after tumor innoculation.
