# Supplementary material for: Transcriptomic analysis of long noncoding RNAs and mRNAs expression profiles in the spinal cord of bone cancer pain rats
Source: Mol Brain. 2020 Mar 24;13:47. doi: 10.1186/s13041-020-00589-2 (PMC7092675; doi:10.1186/s13041-020-00589-2)
Supplement: Supplementary file 2 — Additional file 2: Table S2. Statistical data of high-throughput sequencing for six samples. [file 13041_2020_589_MOESM2_ESM.xlsx]

## Sheet: Sheet1
Table S2. Statistical data of high-throughput sequencing for six samples.
Sample ID	Raw reads	Clean reads	Clean ratio	rRNA trimed	No rRNA pair	Mapped reads
S1	83027184	79043196	0.952	78945047	77990386	71815185
S2	89694294	86071877	0.9596	85992107	85094720	77598775
S3	94594536	90433764	0.956	90346011	89338650	81925902
B1	74722396	71451902	0.9562	71352081	70506282	64836736
B2	83906740	80755443	0.9624	80646008	79822606	73306710
B3	80601660	77607590	0.9629	77513593	76717386	70698375
Note: S1, S2, S3, triplicate sample of sham-operated group; B1, B2, B3, triplicate sample of bone cancer pain group
