# Supplementary material for: Transcriptomic analysis of long noncoding RNAs and mRNAs expression profiles in the spinal cord of bone cancer pain rats
Source: Mol Brain. 2020 Mar 24;13:47. doi: 10.1186/s13041-020-00589-2 (PMC7092675; doi:10.1186/s13041-020-00589-2)
Supplement: Supplementary file 7 — Additional file 7: Table S4. Top 20 clusters with their representative enriched terms (one per cluster). [file 13041_2020_589_MOESM7_ESM.xlsx]

## Sheet: DEG
Michael Costigan	Xinran Hou	Hui Du
ADFP	RT1-Ba	Cxcl13
ADORA3	Cd74	Reg3b
AIF1	RT1-Bb	Plac8
ANXA3	RT1-Da	C1qc
APBB1IP	Cxcl13	Ccl2
APLN	RT1-Db1	C1qa
APOBEC1	Itgax	C3
ARHGAP25	C3	C1qb
ARHGDIB	Ciita	C4a
ARPC1B	Ncf1	C4a
ATF3	Lyz2	Fcer1g
ATHL1	Cxcl16	Ngfr
AXL	Clec7a	Fcgr3a
AY616753	Irf8	Fyb
B2M	Scin	Fcgr1a
BIN2	Cxcl9	LOC103691423
BSN	Plek	Cd22
BTG1	Ubd	Gapt
C1QA	Ptprc	Ly86
C1QB	Gpnmb	Cd33
C1QC	LOC499229	Pld4
C3	Naip6	Ltc4s
C4A	Serping1	Cd53
C4ORF19	Itgal	Ctsz
C9ORF72	Nckap1l	Clec4a1
CARD9	Fcgr3a	Rpe65
CCL13	Ptpn6	Irf8
CCR5	RGD1566307	Atf3
CD37	Klrk1	Apobec1
CD4	Hk3	Tmem176a
CD53	Cd68	Cyp4b1
CD68	Ly86	Gpr31
CDH23	Arhgap30	Aoah
CFH	Lsp1	LOC102557117
CHSY1	Cp	Clec7a
CLEC4A3	Fcnb	Bin2
CLIC1	Tlr10	Gpr34
CMTM7	Trpm2	Mx1
COIL	Myo1f	Gpr183
CORO1A	Clec12a	AABR07001573.2
CP	Slamf8	Cd68
CREG1	Nfam1	AC115371.1
CSF1R	Card11	Oosp1
CTSC	Fcer1g	Tmem176b
CTSH	Dock8	Adgre1
CTSS	Adgre1	Fcgr2b
CTSZ (includes EG:252929)	Rac2	Cyth4
CX3CR1	Olr1	Aif1
CXCL13	Lyn	Plek
CXCL16	C1qb	Wipf3
CYBA	Anxa3	Itgad
CYBB	Slc11a1	RGD1309350
DUSP6	Tagap	Anxa3
EFCAB4A	Fyb	Laptm5
EHD4	Kcnn4	Tmem154
FCGR2A	Plac8	Csf1r
FCGR2B	LOC498435	Urgcp
FCGR3A	Lacc1	LOC500300
FERMT3	Irg1	Klhdc7a
FGFRL1	Rasal3	AABR07026893.1
FXYD5	C1qa	Dusp1
GBP2	Fgr	Plac9
GLT25D1	Ctsc	AABR07042903.1
GMFG	Il10ra
GNS	Hck
GOLPH2 PREDICTED	Aif1
GPNMB	Spi1
GRN	Laptm5
H2-BL	Pik3cg
HCK	Irf1
HEXB	Tnfrsf14
HK2	Sp140
HLA-DMA	B2m
HLA-DMB	Cd53
HLA-E	Epsti1
HLA-G	Itgb2
HN1	Hcls1
ICAM1	Cybb
ICOSLG	Klra2
IFI30	Ptpn7
IFNGR1	Vav1
IFNGR2	Ifi30
IL13RA1	Ucp2
IL17RA	Lrrk1
IL18	C2
INPP5D	Unc93b1
IRF1	Tlr7
IRF8	Ch25h
ITGAM	Cd84
KCTD12	Akna
KIAA1949	Ccr5
KLHL6	Mvp
KPNA2	Ccl2
LAPTM5	RT1-CE7
LCP1	Pram1
LCP2	Arhgdib
LGALS3BP	MGC105649
LGMN	Bcl2a1
LIMD2	Pik3ap1
LOC305633	Hk2
LOC498276	Dock2
LOC498279	Il21r
LRG1	Ggta1
LY86	Cyth4
LYN	Lcp2
LYZ	LOC100909630
MAN2B1	Axl
MAPKAPK3	Tlr13
MEF2C	Lcp1
MOBKL1B	C1qc
MPEG1	Klrc2
MX2	Plcg2
MYD88	Prf1
MYLIP	Ctsz
NCF1C	Mefv
NEK6	Il2rg
NFE2L2	Alpk3
NFKB1	Bin2
NPC2	Casp4
NRP1	Hmha1
NT5E	Mpeg1
OAF	Wdfy4
P2RY14	Ifi47
P2RY6	Csf2rb
PARP14	RT1-CE5
PARP9	Arpc1b
PDLIM4	Fgd2
PDPN	Zbp1
PLA2G4A	Pygl
PLAC8	Fes
PLEK	Clic1
PRKCD	Tyrobp
PROS1	Cd180
PSMB8	Sipa1
PSME1	Ms4a6a
PTPN1	Tnfaip8l3
PTPN18	Ikzf1
PTPN6	RGD1559575
PTPRC	Fcrl2
PYCARD	Siglec1
PYGL	Mt2A
RAC2	Tfec
RAP1B	Dapp1
RASA4	Cyba
REG3A	RT1-CE16
RGD1562552 PREDICTED	RT1-DOa
RGD1566254 PREDICTED	Cd3e
RGS10	Pim1
RGS2	Cx3cr1
RNASET2	Btk
RPS4X	Pik3r5
RRM2	Tmem173
SCAMP2	Hba2
SERPINB1	Tlr9
SH2B3	Ctsh
SIRPA	Tbxas1
SKAP2	Hcar2
SLA	Cd8a
SLC7A7	Itga4
SLCO2B1	Adgrg5
SOAT1	Tgfbr1
SP110	Nlrp1a
SSH2	Themis2
STAT1	Fabp7
STK10	Icam1
SYNGR2	Cd300lf
TEP1	Psmb9
TGFB1	Lag3
TGFBR1	Slfn13
TIMP1	Pld4
TMEM176A	Cd37
TMEM176B	Itk
TNFRSF1A	Rhoh
TNNC2	Cfh
TPM3	Gcnt1
TRAM1	Gpr31
TSPAN8	Ptprcap
TSPO	Gsap
TYROBP	Nlrp3
UCP2	LOC691141
UGT1A6	St14
VASP	Ptafr
VAV1	Il18
VGF	Elf4
XIRP1	Cd4
ZFP36L1	Tmsb4x
ZFP36L2	Sh3bp2
	Pou2f2
	Gpr65
	Gna15
	Msr1
	Inpp5d
	Map4k1
	RT1-DOb
	Hist1h2bk
	Coro1a
	Slfn2
	Scimp
	Csf1r
	Pabpc1

## Sheet: Top 200 enrichment
Table S4. Top 20 clusters with their representative enriched terms (one per cluster).
GO	Category	Description	Count	%	Log10(P)	Log10(q)
GO:0002252	GO Biological Processes	immune effector process	64	33.33	-40.6	-36.33
GO:0050776	GO Biological Processes	regulation of immune response	61	31.77	-35.73	-31.77
GO:0045087	GO Biological Processes	innate immune response	52	27.08	-30.78	-27.12
GO:0046649	GO Biological Processes	lymphocyte activation	54	28.12	-30.56	-26.99
R-RNO-168249	Reactome Gene Sets	Innate Immune System	51	26.56	-27.48	-24.18
GO:0002274	GO Biological Processes	myeloid leukocyte activation	31	16.15	-24.66	-21.44
GO:0006954	GO Biological Processes	inflammatory response	47	24.48	-24.51	-21.32
GO:0001816	GO Biological Processes	cytokine production	49	25.52	-24.1	-20.94
GO:0006909	GO Biological Processes	phagocytosis	27	14.06	-20.81	-17.87
rno05150	KEGG Pathway	Staphylococcus aureus infection	17	8.85	-19.88	-17.05
GO:0098542	GO Biological Processes	defense response to other organism	36	18.75	-19.57	-16.76
R-RNO-1280218	Reactome Gene Sets	Adaptive Immune System	33	17.19	-16.24	-13.61
GO:1903706	GO Biological Processes	regulation of hemopoiesis	30	15.62	-16.21	-13.59
GO:0002683	GO Biological Processes	negative regulation of immune system process	31	16.15	-15.2	-12.65
GO:0001906	GO Biological Processes	cell killing	20	10.42	-13.94	-11.46
GO:0050900	GO Biological Processes	leukocyte migration	25	13.02	-13.49	-11.02
GO:0071216	GO Biological Processes	cellular response to biotic stimulus	23	11.98	-11.91	-9.58
rno04650	KEGG Pathway	Natural killer cell mediated cytotoxicity	14	7.29	-11.6	-9.29
GO:0034341	GO Biological Processes	response to interferon-gamma	16	8.33	-11.08	-8.79
GO:0019221	GO Biological Processes	cytokine-mediated signaling pathway	23	11.98	-11	-8.73
Note: For each given gene list, pathway and process enrichment analysis has been carried out with the following ontology sources: GO Biological Processes, KEGG Pathway, Reactome Gene Sets and CORUM. All genes in the genome have been used as the enrichment background. Terms with a p-value < 0.01, a minimum count of 3, and an enrichment factor > 1.5 (the enrichment factor is the ratio between the o…
